# Non-Parametric Analysis of Inter-Individual Relations Using an Attention-Based Neural Network

Takashi Morita<sup>\*1</sup>, Aru Toyoda<sup>2</sup>, Seitaro Aisu<sup>1</sup>, Akihisa Kaneko<sup>1</sup>, Naoko Suda-Hashimoto<sup>1</sup>, Ikki Matsuda<sup>2,3,4,5</sup>, and Hiroki Koda<sup>1</sup>

<sup>1</sup>Primate Research Institute, Kyoto University

<sup>2</sup>Chubu University Academy of Emerging Sciences

<sup>3</sup>Wildlife Research Center of Kyoto University

<sup>4</sup>Japan Monkey Centre

<sup>5</sup>Institute for Tropical Biology and Conservation, Universiti Malaysia Sabah

March 26, 2020

## Abstract

In the past decade, social network analysis was widely adopted in animal studies, and it enabled the revelation of global characteristic patterns of animal social systems from pairwise inter-individual relations. Animal social networks are typically drawn based on geographical proximity and/or frequency of social behaviors (e.g., grooming), but the appropriate choice of the distance/closeness metric is not clear especially when prior knowledge about the species/data is limited. In this study, the researchers explored a non-parametric analysis of inter-individual relations using a neural network with the attention mechanism, which plays a central role in natural language processing. The high interpretability of the attention mechanism and the flexibility of the entire neural network allow automatic detection of inter-individual relations included in raw data. As case studies, three-dimensional location data collected from simulated agents and real Japanese macaques were analyzed.

**Keywords:** interaction, social network analysis, animal society, Japanese macaque, deep learning, attention mechanism

## Significance Statement

- Novel non-parametric analysis of inter-individual relations is proposed.
- The proposed method is based on an artificial neural network and automatically detects latent inter-individual dependencies behind raw data, without prior assumptions about the possible types of relations or random distributions involved.
- The performance of the method was tested on simulated and real three-dimensional location data of Japanese macaques.
- The analysis will be effective especially when little is yet known about the species under study.

---

\*Corresponding author: [tmorita@alum.mit.edu](mailto:tmorita@alum.mit.edu)

# 1 Introduction

Understanding the characteristics of animal social groups is a major objective of animal ecology. Complex social systems of eusocial insects and non-human primates are often viewed as biological models or precursors of human societies, and as such, have also attracted the interest of social scientists. In the past decade, social network analysis was widely adopted in animal studies, and it enabled us to reveal global characteristic patterns of animal social systems from pairwise inter-individual relations (Krause et al., 2015).

The application of social network analysis to animal studies requires an appropriate metric for the relational distance/closeness between individuals. Popular options of the metric include geographical proximity (often thresholded and converted to counts of co-appearance within the threshold; Silk et al., 2006b,a; Croft et al., 2008; Clark, 2011; Boyland et al., 2013; Castles et al., 2014; Krause et al., 2015; Schofield et al., 2019) and frequency of social behaviors (e.g., grooming of non-human primates; Chepko-Sade et al., 1989; Silk et al., 2006b,a; Croft et al., 2008; Clark, 2011; King et al., 2011b,a; Castles et al., 2014; Krause et al., 2015). However, the appropriate choice of the metric is not necessarily clear, especially when prior knowledge about the species/data is limited (cf. Castles et al., 2014; Farine and Whitehead, 2015). For example, location information for measuring the proximity is available from a wide variety of animals. This includes even those species whose social activities are not yet well-known. Location information also became more reliable and scalable thanks to the recent developments in bio-logging technology (Heupel et al., 2006; Rutz and Hays, 2009; Rutz et al., 2012; Fehlmann and King, 2016; King et al., 2018; Dore et al., 2020). However, naively measuring the Euclidean distance between individuals is not necessarily reasonable because the vertical and horizontal divergences would not have the same importance in social network analysis; Many terrestrial animals do not fly or dive, and cannot control the vertical distance from other individuals. Even the horizontal distance among animal agents could have different social meanings if other factors, such as trees and other objects, intervene. Hence, it is ideal to have a non-parametric, end-to-end analyzer of inter-individual relations that runs on raw data.

The present study explores non-parametric analysis of inter-individual relations using a neural network. Specifically, the researchers exploit an interpretable module called *attention mechanism*, as well as the flexibility of the entire neural network that fits to different types of data. The attention mechanism was originally invented for machine translation to represent relations between words in the source and target languages (Figure 1a; Bahdanau et al., 2015). More recently, studies begin to use attention mechanism to represent word relations within input sentences (self-attention, Figure 1b; Vaswani et al., 2017; Devlin et al., 2018). It is now considered central technology in today's natural language processing (NLP) in general. The present study applies this technology to three-dimensional (3D) location data collected from Japanese macaques (*Macaca fuscata*) to reveal their latent relations reflected in the data (Figure 1c), without prior assumptions about the possible types of relation structures or noise distributions. The said approach was validated by analyzing simulated data and recovering the latent relations among the virtual agents generating the data. Even though only the location data are discussed in this study, the possible applications of our relation analysis are not limited to the location data because of the flexibility of the neural network.

Our model organism, the Japanese macaque, exhibits rich affiliative and aggressive social behaviors and has been studied extensively for over more than 50 years for better understanding of the evolution of social systems in primate lineages, including humans (Nakagawa et al., 2010). This accumulated knowledge of the species is helpful to interpret/evaluate the results of our novel analysis even though the method is not limited to the species or other primates and could even be more valuable for further studies about animals that do not show interpretable social activities.

## 2 Materials & Methods

### 2.1 Overview of the Neural Network

The framework of the relation analysis in this study is to (i) train a neural network that predicts the 3D location of each individual macaque—simulated or real—from that of the other individuals, and then (ii) check how much attention the network pays to each of the referent individuals when it makes the predictions. For simplicity, the network only receives the location data at a single timepoint and does not analyze temporal

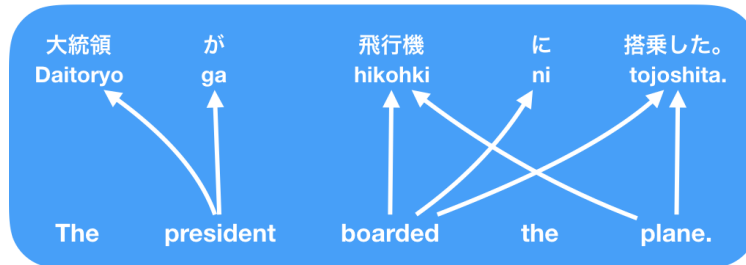

(a) Machine Translation

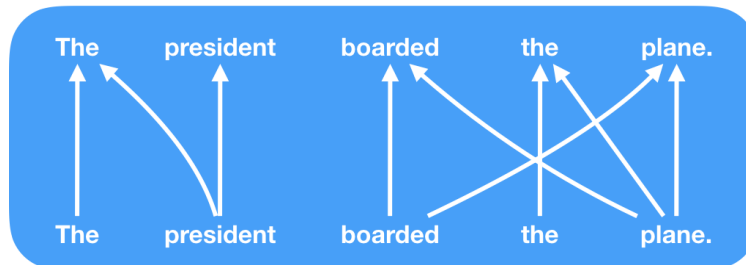

(b) Self-Attention

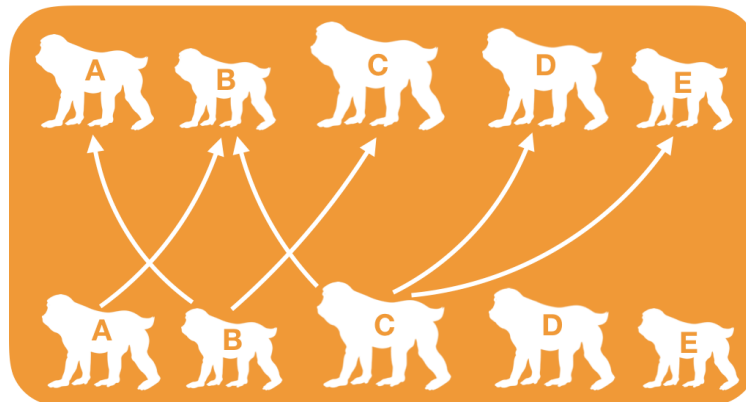

(c) Inter-Individual Relations

Figure 1: History of the use of attention mechanism. (a) The original use of attention mechanism in machine translation, relating words in the source language (English) to ones in the target language (Japanese). (b) More recent application in NLP that represents relations between words within the input sentences. (c) Application to inter-individual relations explored in this study.

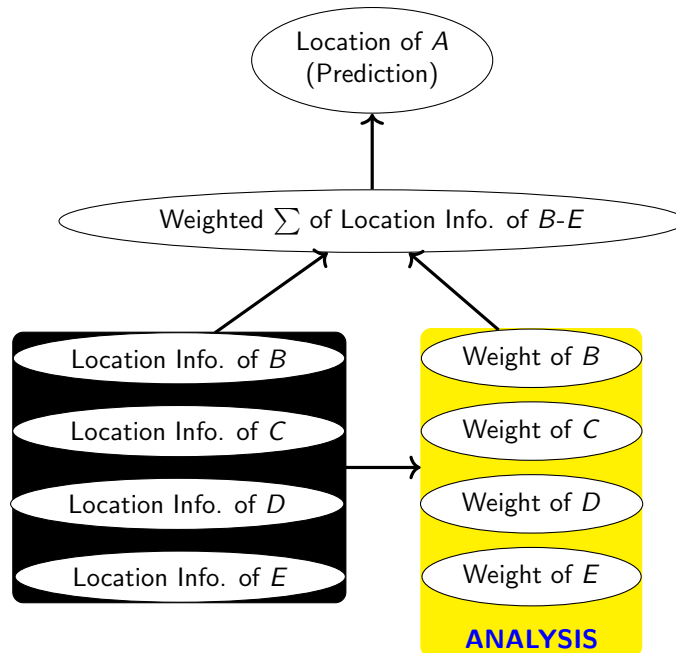

Figure 2: Schematic diagram of attention-based analysis.

50 changes in the location data, although the temporal information could include important traits of individuals  
51 and groups (cf. Morita et al., 2020) and thus should be discussed in future studies.

52 Figure 2 sketches the network structure, abstracting away from fine details (see the supporting information  
53 S1 for the full structure of the network). The location of an individual named *A* is predicted from that of  
54 four other individuals, *B*, *C*, *D*, and *E*. The prediction is made from the weighted sum of the (transformed)  
55 location information of the four referents, where the weight of each referent—called *attention weight*—is also  
56 derived from the location information. The attention weights govern the information flow from the referents;  
57 they intuitively represent *who is contributing how much to the prediction*. Our analysis of the relations  
58 between the target and the referents is performed on these attention weights.

59 The attention weights were normalized and always have a sum of 1. However, this formalization has one  
60 disadvantage. The model never detects the independence of the target individual, as at least one referent  
61 always has a non-zero weight. Accordingly, the predictive performance of the attention model was compared  
62 with a baseline model that predicts the target without reference to the other individuals. If the attention  
63 weights are redundant, the attention model will have the same level of predictive performance as the no-  
64 referent baseline. The baseline model was trained to maximize the likelihood.<sup>1</sup>

## 65 2.2 Data

66 Attention-based relation analysis was performed on two simulated data (§2.2.1) and one real data (§2.2.2).

### 67 2.2.1 Simulated Data

68 The researchers tested the reliability of the attention-based relation analysis on two types of simulated data.  
69 Following the real data collected from Japanese macaques (see §2.2.2), both simulations had five individuals  
70 located in a bounded 3D space ( $[0.0, 5.0] \times [0.0, 4.0] \times [0.0, 2.5]$ ), resembling the group cage where the macaques  
71 were kept.

72 The first simulation modeled the situation where the five agents moved in a sequence, each following  
73 the other (Figure 3a). This pattern was simulated by sampling the 3D location of each individual from

<sup>1</sup>As reported in §2.2, the location of the target individual was discretized, which often improves the performance of neural networks (van den Oord et al., 2016a,b). Hence, the maximum likelihood training of the baseline model was simple. The occurrences of each discretized location value were counted and then the gathered data were normalized.

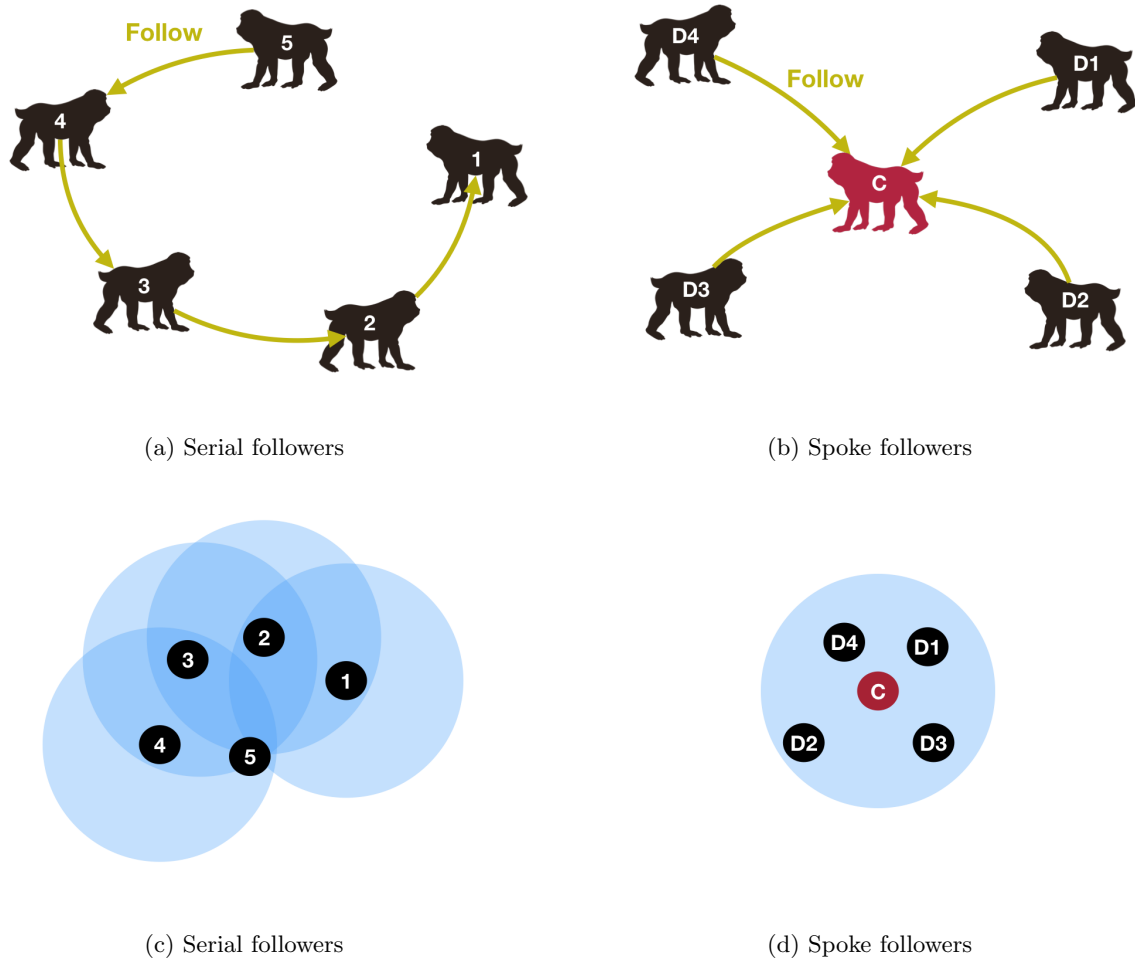

Figure 3: Two patterns of simulated data. (a) and (c) model animal agents that move in a sequence. (b) and (d) model the situation where there is a single hub individual (red) that is followed by the other four spoke dependents (black). (a) and (b) depict the relations among the animal agents modeled in the simulations. (c) and (d) describe the distributions from which the location data are sampled: The blue circles represent the support of the uniform distribution centered at each following individual.

74 the neighborhood of its predecessor: (i) the first individual was located uniformly randomly in the domain,  
 75 and (ii) the  $(i + 1)$ -th individual was located uniformly randomly in the intersection of the domain and  
 76 the sphere with 1.5 radius centered at the  $i$ -th individual’s location, which was implemented by rejection  
 77 sampling (Figure 3c).

78 The second simulation modeled the hub and spoke relation in which a single hub individual was followed  
 79 by the other four spoke dependents (Figure 3b). The researchers simulated this situation by (i) first sampling  
 80 the location of the hub individual uniformly from the domain, and (ii) sampling the location of the spoke  
 81 individuals uniformly from the intersection of the domain and the sphere with 1.5 radius centered at the hub  
 82 individual’s location.

83 For each of the two simulations, 100,000 samples were generated—each containing 3D coordinates of  
 84 the five individuals.<sup>2</sup> All the samples were used for the training and the attention analysis afterward. The  
 85 researchers did not hold out a test portion of the data, as the study’s purpose was not to test the general  
 86 applicability of the model predictions, but rather to reveal the dependency relations in the data (just as in

<sup>2</sup>The number of different target-referents pairs observed by the neural network was  $5 \times 100,000 = 500,000$ , since all the possible partitions of the five individuals were treated in the analysis as one target and four referents.

87 the linear regression tests).

88 Note that in both cases, the location samples were the only information available to the neural network  
89 analyzer. Furthermore, the settings of the simulations, including the type of the inter-individual relations and  
90 the form of the conditional distributions, were not hard-coded in the analyzer, unlike other classical analyses  
91 assuming a limited hypothesis space including the correct generative model (e.g., Bayesian inference). For  
92 example, when analyzing the data from the second simulation, the network had to (i) discover the hub  
93 structure among many other possible relation patterns behind the data, and (ii) identify the hub individual  
94 while all the five agents were always close to one another.

95 Although the simulated data took on continuous values (residing in the bounded subspace of the 3D  
96 Euclidean), it has been reported that neural networks are often better at predictions of discrete categories  
97 (due to the flexibility of categorical distributions; van den Oord et al., 2016a,b, similar discrete predictions  
98 of location data were also adopted by Takeda and Komatani, 2016). Accordingly, the domain was split into  
99 400 cubes ( $0.5 \times 0.5 \times 0.5$ ), and the network was trained to make a discrete prediction of the cube containing  
100 the target's location.

## 101 2.2.2 Real Data

102 In addition to the simulated data described in §2.2.1, the researchers analyzed real 3D location data of  
103 five captive Japanese macaques in the Primate Research Institute, Kyoto University (KUPRI), Japan. The  
104 subjects were two adult males and three adult females. The location recordings of the five macaques were  
105 conducted for two weeks in an outdoor group cage ( $4 \times 5 \times 2.5$  m), where the subjects were allowed to freely  
106 move and interact with one another. Each subject carried two Bluetooth<sup>®</sup> Low-Energy beacons, and their  
107 3D location was estimated based on the signals coming from these beacons (Quuppa Intelligent Locating  
108 System<sup>™</sup>). See Morita et al. (2020) for more details on the data collection procedure.

109 Although the system sampling frequency was set at 9 Hz, the actual rate was unstable because of  
110 uncontrollable signal interference and reflection perturbation. The sampling from the  $2 \times 5 = 10$  beacons did  
111 not also synchronize their timing. Accordingly, the researchers took the median value of the samples from  
112 each individual (i.e., from the two beacons) for each dimension collected in every 3000 msec interval. The  
113 medians over the same interval constituted the input-output pair for the neural network.<sup>3</sup> This sacrifices  
114 time resolution of the collected data; however, this was not fatal to this study as the temporal information  
115 was ignored in the analysis. The preprocessing above yielded a total of 327,592 sets of data.<sup>4</sup> Just as in the  
116 simulations, all the data was used for both the model training and attention analysis without holding out a  
117 test portion, and the target locations were discretized into 400 cubes ( $0.5 \times 0.5 \times 0.5$  m).

## 118 3 Results

119 Figure 4 reports the average attention weights among five individuals in two representations. The heatmaps  
120 on the left-hand side represent the attention weight assigned to each referent individual (column) upon the  
121 prediction of the target individual (row) by the color density of the corresponding cell. Moreover, the directed  
122 graphs on the right-hand side represent the same information by the color density of the arrows coming from  
123 the referents to the targets.

124 The attention-based analysis correctly distinguished the two simulation patterns. Given the data from  
125 the serial follower simulation, the analyzer correctly assigned heavy weights ( $> 0.1$ ) to the relations between  
126 the individuals with successive indices (e.g., “2” and “3”; Figure 4a,b). On another note, the hub-spoke  
127 simulation concentrated the attention weights to the hub individual when predicting the spoke dependents,  
128 and evenly distributed the weights to the spokes when predicting the hub (Figure 4c,d).

129 The analysis of the real data revealed that the female macaques were more informative referents than  
130 the males, especially when predicting the other females. The attention weight to Male 1 as a referent was  
131 smaller compared with all the females, except when Male 2 was predicted (where Female 1 collected zero

<sup>3</sup>The network simultaneously analyzed all the possible choices of one individual as the prediction target and four as the referents.

<sup>4</sup>Again, the researchers analyzed all the possible partitions of the five individuals into one target and four referents, and thus, the number of different target-referents pairs observed by the neural network was  $5 \times 327,592 = 1,637,960$ .

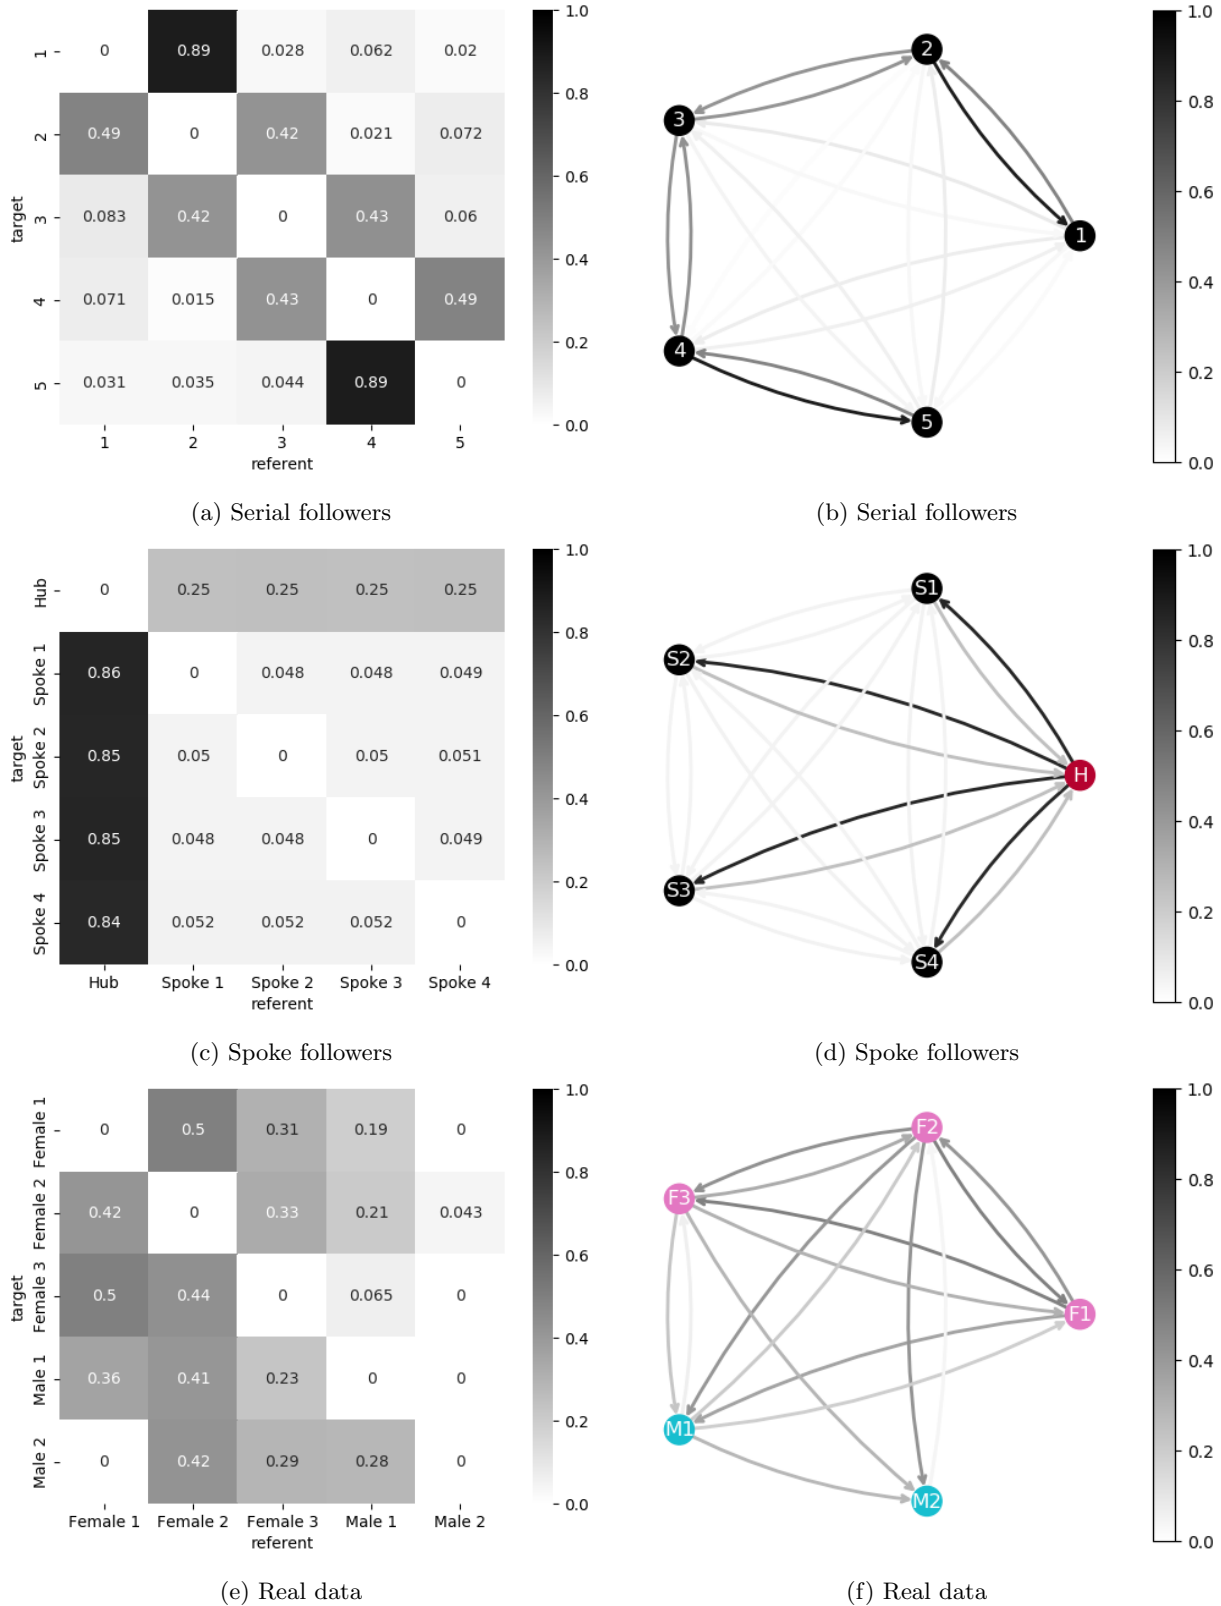

Figure 4: Attention weights. The same data are reported in heatmaps on the left-hand side and in directed graphs on the right-hand side. Top (a,b): results from the simulation with serial followers (Figure 3a,c). Middle (c,d): results from the simulation with a single hub individual and four spoke dependents (Figure 3b,d). Bottom (e,f): results from the real location data collected from two male and three female Japanese macaques (§2.2.2).

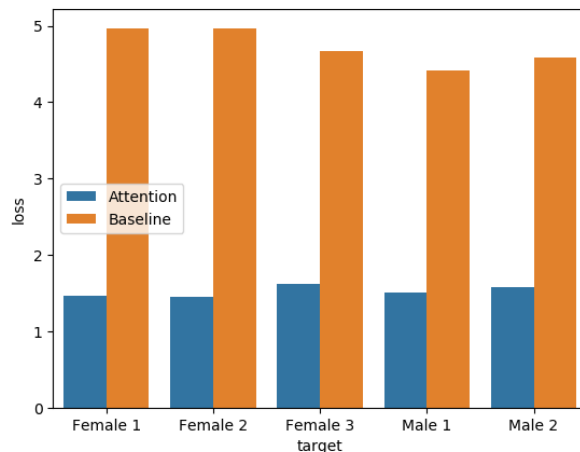

Figure 5: Average prediction loss (negative log probability) of the attention-based neural network and the no-referent baseline.

132 attention),<sup>5</sup> and Male 2 was almost never used as a referent (Figure 4e,f). It is of note, however, that the  
133 males did not move independently of the other individuals. The predictions of the males' location were based  
134 on three other individuals (Male 1 was dependent on the females, and Male 2 was dependent on Female 2, 3,  
135 and Male 1). While the neural network was unable to flag independence as the attention weights were never  
136 all zeros, these detected dependencies were not redundant because the network outperformed the no-referent  
137 baseline. As shown in Figure 5, the average prediction loss (i.e., negative log probability) of the attention  
138 model was smaller compared with the baseline across all the individuals.

## 139 4 Discussion

140 In the study, the attention analysis correctly identified the latent relations behind the two types of simu-  
141 lated data, one having serial followers and the other having the spoke followers. While these simulations  
142 were simple, it is of note that the analyses were performed without prior assumptions about the possi-  
143 ble types of inter-individual relations or random distributions involved. Compared with the traditional  
144 distance/closeness-based analyses (Silk et al., 2006b,a; Croft et al., 2008; Clark, 2011; Boyland et al., 2013;  
145 Castles et al., 2014; Krause et al., 2015; Schofield et al., 2019), this method would be more effective in  
146 visualizing latent dependency patterns, especially when little is yet known about the properties of data.

147 The study also demonstrated that the attention analysis is applicable to raw real data, reporting a case  
148 study of Japanese macaques. The researchers found that the location of females is more informative than  
149 that of males in locating the other female individuals. This result is consistent with the female-oriented social  
150 system of the macaques: Japanese macaques are a female-philopatric species (represented by parturition in  
151 the natal group and male emigration), and females usually build firmer and more stable social relationships  
152 with one another than males (e.g., matrilineal social rank succession; Yamada, 1963; Furuichi, 1984; Mitani,  
153 1986; Nakagawa et al., 2010). The females of the species are also reported to exhibit more tight and frequent  
154 spatial cohesion (Otani et al., 2014). Therefore, knowing the location of some females is expected to increase  
155 the chance of locating other females in the same group. In addition, the researchers' earlier study on the  
156 same data showed that the males' movements (i.e. trajectories of the 3D location) reflect a greater degree  
157 of individuality than that of the females (Morita et al., 2020). Because of such idiosyncratic movements, the  
158 males' location may not be informative predictors of other individuals' location. The analysis of the real data  
159 also revealed that one individual (Male 2) was almost never attended by the others. The discovery of such  
160 distinguished individuals is useful to build new hypotheses about the animal society and plan behavioral  
161 experiments targeting them.

<sup>5</sup>The average attention to Male 1, upon the predictions of Male 2, looked equal to the attention to Female 3, but it actually was statistically significantly smaller, considering the 10,000 samples of bootstrapping.



162 Attention analysis does not exploit any behavioral patterns that are particular to Japanese macaques,  
163 and researchers can use it for location data of other animals, including ones that do not exhibit prototypical  
164 social behaviors such as grooming. It can also be used if the conventional metric of distance/closeness is  
165 unavailable. The researchers further emphasize that attention analysis is not limited to location data because  
166 the flexibility of the neural network would allow its application to a wide variety of data with interacting  
167 components. For example, vocal communication has been of major interest to behavioral biologists as well  
168 as evolutionary linguists (Levinson, 2016). Attention analysis could potentially reveal latent communication  
169 flow when applied to the vocalization recordings of multiple individuals. It is to be noted, however, that  
170 the proposed method needs to be extended and refined for such broader applications and for more detailed  
171 analyses of location/movement. For example, the current version does not process temporal changes in  
172 location, whereas the implementation of temporal analysis is crucial in analyzing dynamic behaviors and  
173 vocal communication. Since the attention mechanism was developed for NLP, however, processing time  
174 series data should not be so hard (see Vaswani et al., 2017; Shaw et al., 2018; Dai et al., 2019, for popular  
175 ways to encode time information).

## 176 Acknowledgements

177 We appreciate the animal care by our technicians and research assistants as well as their suggestions and  
178 support for this project. In particular, we wish to express special thanks to Norihiko Maeda, Mayumi  
179 Morimoto, and Takayoshi Natsume for animal arrangements, and Panasonic Solution Technologies Co., Ltd.  
180 for the apparatus technical supports. We also acknowledge the profound comments and suggestions from  
181 Zin Arai and Hiroshi Takeuchi regarding the analysis. This study was performed under the Cooperative  
182 Research Program at KUPRI (2018-C-27, 2019-B-27).

## 183 Funding

184 This study was mainly funded by the Japan Science and Technology Agency, Core Research for Evolu-  
185 tional Science and Technology 17941861 (#JPMJCR17A4) and partly by MEXT Grant-in-aid for Scientific  
186 Research on Innovative Areas #4903 (Evolinguistic), 17H06380.

## 187 Ethical Statement

188 All the procedures were reviewed and approved by the Animal Welfare and Care Committee of KUPRI  
189 (Permission # 2018-203) and complied with the institutional guidelines (Primate Research Institute, 2010).

## 190 Author contributions

191 Project organization: IM HK; Animal arrangements: HK SA NSH; Apparatus building: AT IM HK; Data  
192 acquisition: AT IM HK; Animal cares: AK AT IM HK; Data management; HK AT TM; Computational  
193 modeling: TM; Manuscript writing: IM HK TM.

## 194 References

- 195 Bahdanau, D., Cho, K., and Bengio, Y. (2015). Neural machine translation by jointly learning to align  
196 and translate. In *3rd International Conference on Learning Representations, ICLR 2015, San Diego, CA,  
197 USA, May 7-9, 2015, Conference Track Proceedings*.
- 198 Boyland, N. K., James, R., Mlynski, D. T., Madden, J. R., and Croft, D. P. (2013). Spatial proximity loggers  
199 for recording animal social networks: consequences of inter-logger variation in performance. *Behavioral  
200 Ecology and Sociobiology*, 67(11):1877–1890.

- 201 Castles, M., Heinsohn, R., Marshall, H. H., Lee, A. E., Cowlshaw, G., and Carter, A. J. (2014). Social  
202 networks created with different techniques are not comparable. *Animal Behaviour*, 96:59–67.
- 203 Chepko-Sade, B., Reitz, K. P., and Sade, D. S. (1989). Sociometrics of macaca mulatta iv: Network analysis  
204 of social structure of a pre-fission group. *Social Networks*, 11(3):293–314. Special Issue on Non-Human  
205 Primate Networks.
- 206 Clark, F. E. (2011). Space to choose: network analysis of social preferences in a captive chimpanzee com-  
207 munity, and implications for management. *American Journal of Primatology*, 73(8):748–757.
- 208 Croft, D. P., James, R., and Krause, J. (2008). *Exploring Animal Social Networks*. Princeton University  
209 Press.
- 210 Dai, Z., Yang, Z., Yang, Y., Carbonell, J., Le, Q. V., and Salakhutdinov, R. (2019). Transformer-XL:  
211 Attentive language models beyond a fixed-length context.
- 212 Devlin, J., Chang, M.-W., Lee, K., and Toutanova, K. (2018). BERT: Pre-training of deep bidirectional  
213 transformers for language understanding. arXiv:1810.04805.
- 214 Dore, K. M., Hansen, M. F., Klegarth, A. R., Fichtel, C., Koch, F., Springer, A., Kappeler, P., Parga, J. A.,  
215 Humle, T., Colin, C., Raballand, E., Huang, Z.-P., Qi, X.-G., Di Fiore, A., Link, A., Stevenson, P. R.,  
216 Stark, D. J., Tan, N., Gallagher, C. A., Anderson, C. J., Campbell, C. J., Kenyon, M., Pebsworth, P.,  
217 Sprague, D., Jones-Engel, L., and Fuentes, A. (2020). Review of GPS collar deployments and performance  
218 on nonhuman primates. *Primates*.
- 219 Farine, D. R. and Whitehead, H. (2015). Constructing, conducting and interpreting animal social network  
220 analysis. *Journal of Animal Ecology*, 84(5):1144–1163.
- 221 Fehlmann, G. and King, A. J. (2016). Bio-logging. *Current Biology*, 26(18):R830–R831.
- 222 Furuichi, T. (1984). Symmetrical patterns in non-agonistic social interactions found in unprovisioned  
223 Japanese macaques. *Journal of Ethology*, 2(2):109–119.
- 224 Heupel, M. R., Semmens, J. M., and Hobday, A. J. (2006). Automated acoustic tracking of aquatic animals:  
225 scales, design and deployment of listening station arrays. *Marine and Freshwater Research*, 57(1):1–13.
- 226 King, A. J., Clark, F. E., and Cowlshaw, G. (2011a). The dining etiquette of desert baboons: the roles of  
227 social bonds, kinship, and dominance in co-feeding networks. *American Journal of Primatology*, 73(8):768–  
228 774.
- 229 King, A. J., Fehlmann, G., Biro, D., Ward, A. J., and Fürtbauer, I. (2018). Re-wilding collective behaviour:  
230 An ecological perspective. *Trends in Ecology & Evolution*, 33(5):347–357.
- 231 King, A. J., Sueur, C., Huchard, E., and Cowlshaw, G. (2011b). A rule-of-thumb based on social affiliation  
232 explains collective movements in desert baboons. *Animal Behaviour*, 82(6):1337–1345.
- 233 Krause, J., James, R., Franks, D. W., and Croft, D. P., editors (2015). *Animal Social Networks*. Oxford  
234 University Press.
- 235 Levinson, S. C. (2016). Turn-taking in human communication – origins and implications for language  
236 processing. *Trends in Cognitive Sciences*, 20(1):6–14.
- 237 Mitani, M. (1986). Voiceprint identification and its application to sociological studies of wild Japanese  
238 monkeys (*Macaca fuscata yakui*). *Primates*, 27(4):397–412.
- 239 Morita, T., Toyoda, A., Aisu, S., Kaneko, A., Suda-Hashimoto, N., Matsuda, I., and Koda, H. (2020).  
240 Animals exhibit consistent individual differences in their movement: A case study on location trajectories  
241 of Japanese macaques. *Ecological Informatics*, 56:101057.
- 242 Nakagawa, N., Nakamichi, M., and Sugiura, H. (2010). *The Japanese Macaques*. Primatology Monographs.  
243 Springer Japan.

- 244 Otani, Y., Sawada, A., and Hanya, G. (2014). Short-term separation from groups by male Japanese macaques:  
245 Costs and benefits in feeding behavior and social interaction. *American Journal of Primatology*, 76(4):374–  
246 384.
- 247 Primate Research Institute (2010). *The Care and Use of Laboratory Primates*. The Primate Research  
248 Institute, Kyoto University, third edition.
- 249 Rutz, C., Burns, Z. T., James, R., Ismar, S. M. H., Burt, J., Otis, B., Bowen, J., and St Clair, J. J. H.  
250 (2012). Automated mapping of social networks in wild birds. *Current Biology*, 22(17):R669–R671.
- 251 Rutz, C. and Hays, G. C. (2009). New frontiers in biologging science. *Biology Letters*, 5(3):289–292.
- 252 Schofield, D., Nagrani, A., Zisserman, A., Hayashi, M., Matsuzawa, T., Biro, D., and Carvalho, S. (2019).  
253 Chimpanzee face recognition from videos in the wild using deep learning. *Science Advances*, 5(9).
- 254 Shaw, P., Uszkoreit, J., and Vaswani, A. (2018). Self-attention with relative position representations. In  
255 *Proceedings of the 2018 Conference of the North American Chapter of the Association for Computa-*  
256 *tional Linguistics: Human Language Technologies, Volume 2 (Short Papers)*, pages 464–468, New Orleans,  
257 Louisiana. Association for Computational Linguistics.
- 258 Silk, J., Alberts, S., and Altmann, J. (2006a). Social relationships among adult female baboons (*Papio*  
259 *cynocephalus*) II. variation in the quality and stability of social bonds. *Behavioral Ecology and Sociobiology*,  
260 61:197–204.
- 261 Silk, J., Altmann, J., and Alberts, S. (2006b). Social relationships among adult female baboons (*Papio*  
262 *cynocephalus*) I. variation in the strength of social bonds. *Behavioral Ecology and Sociobiology*, 61:183–  
263 195.
- 264 Takeda, R. and Komatani, K. (2016). Sound source localization based on deep neural networks with direc-  
265 tional activate function exploiting phase information. In *2016 IEEE International Conference on Acoustics,*  
266 *Speech and Signal Processing (ICASSP)*, pages 405–409.
- 267 van den Oord, A., Dieleman, S., Zen, H., Simonyan, K., Vinyals, O., Graves, A., Kalchbrenner, N., Senior,  
268 A., and Kavukcuoglu, K. (2016a). Wavenet: A generative model for raw audio.
- 269 van den Oord, A., Kalchbrenner, N., Espeholt, L., kavukcuoglu, k., Vinyals, O., and Graves, A. (2016b).  
270 Conditional image generation with PixelCNN decoders. In Lee, D. D., Sugiyama, M., Luxburg, U. V.,  
271 Guyon, I., and Garnett, R., editors, *Advances in Neural Information Processing Systems 29*, pages 4790–  
272 4798. Curran Associates, Inc.
- 273 Vaswani, A., Shazeer, N., Parmar, N., Uszkoreit, J., Jones, L., Gomez, A. N., Kaiser, L. u., and Polosukhin,  
274 I. (2017). Attention is all you need. In Guyon, I., Luxburg, U. V., Bengio, S., Wallach, H., Fergus, R.,  
275 Vishwanathan, S., and Garnett, R., editors, *Advances in Neural Information Processing Systems 30*, pages  
276 5998–6008. Curran Associates, Inc.
- 277 Yamada, M. (1963). A study of blood-relationship in the natural society of the Japanese macaque. *Primates*,  
278 4(3):43–65.
